# Supplementary material for: Lack of Cathepsin D in the Renal Proximal Tubular Cells Resulted in Increased Sensitivity against Renal Ischemia/Reperfusion Injury
Source: MDPI journal article supplement (doi:10.3390/ijms20071711), 2019-04-05
Supplement: s1 [file s1]

# Lack of Cathepsin D in the Renal Proximal Tubular Cells Resulted in Increased Sensitivity Against Renal Ischemia/Reperfusion Injury

Chigure Suzuki, Isei Tanida, Masaki Ohmuraya, Juan Alejandro Oliva Trejo, Soichiro Kakuta, Takehiko Sunabori and Yasuo Uchiyama

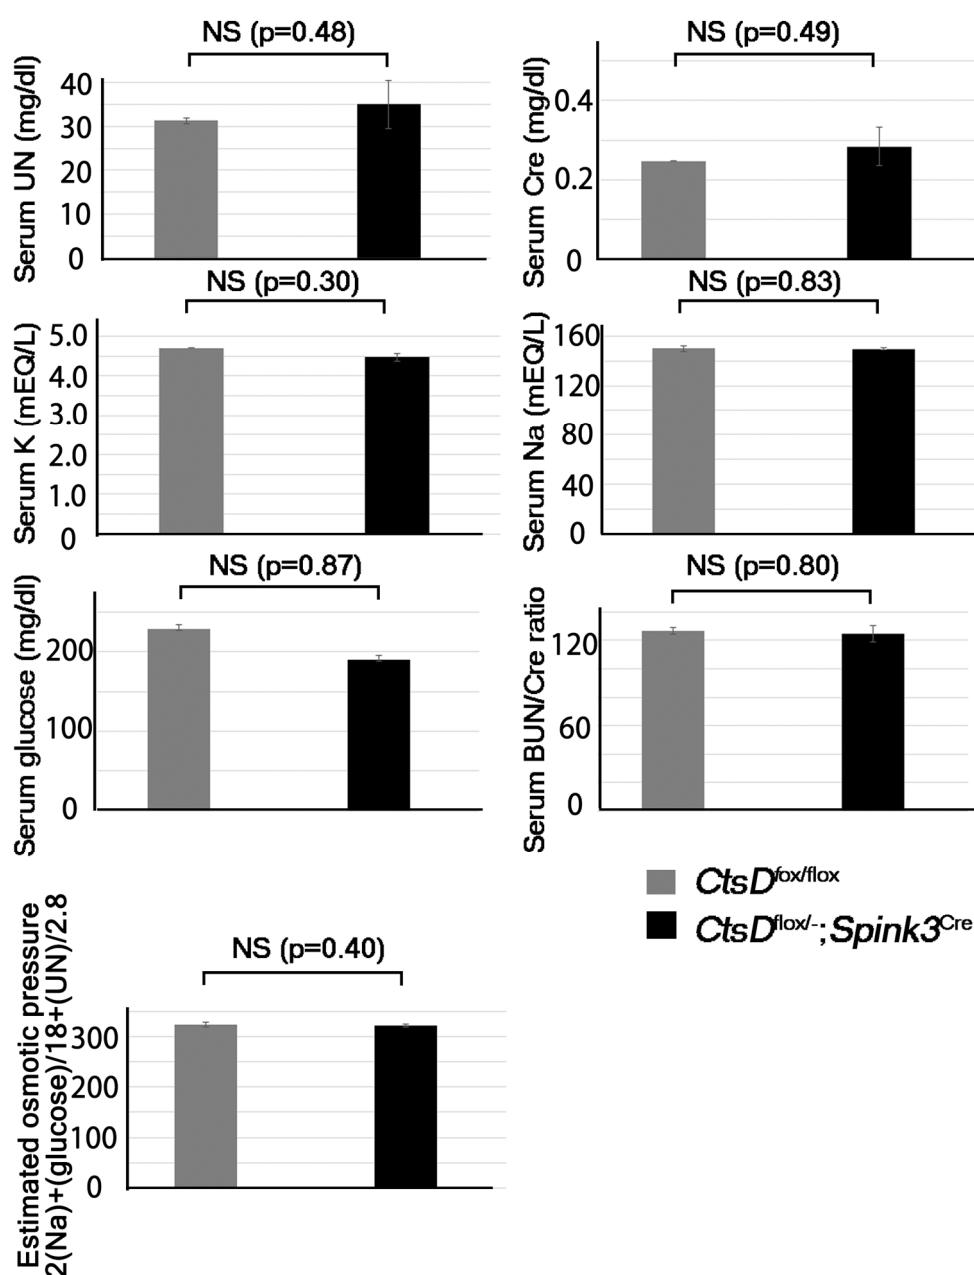

**Figure S1.** Negligible difference in blood tests between *CtsD<sup>flox/-</sup>; Spink3<sup>Cre</sup>* and Control mice. Blood tests of *CtsD<sup>flox/-</sup>; Spink3<sup>Cre</sup>* and control mice were performed at 48 hours after ischemia/reperfusion (I/R) injury. We performed hemi-nephrectomy ahead of I/R because unilateral I/R injury barely induced clear abnormality and bilateral I/R resulted in a large dispersion of data owing to individual differences in wild type mice. Data in graphs are expressed as the mean ± SEM. Statistical analyses

were performed using a student's t-test, and statistical significance was set at  $p < 0.05$ . NS: no significant difference, UN: urea nitrogen, Cre: creatinine, K: potassium, Na: sodium.  $n = 3$  to 4.

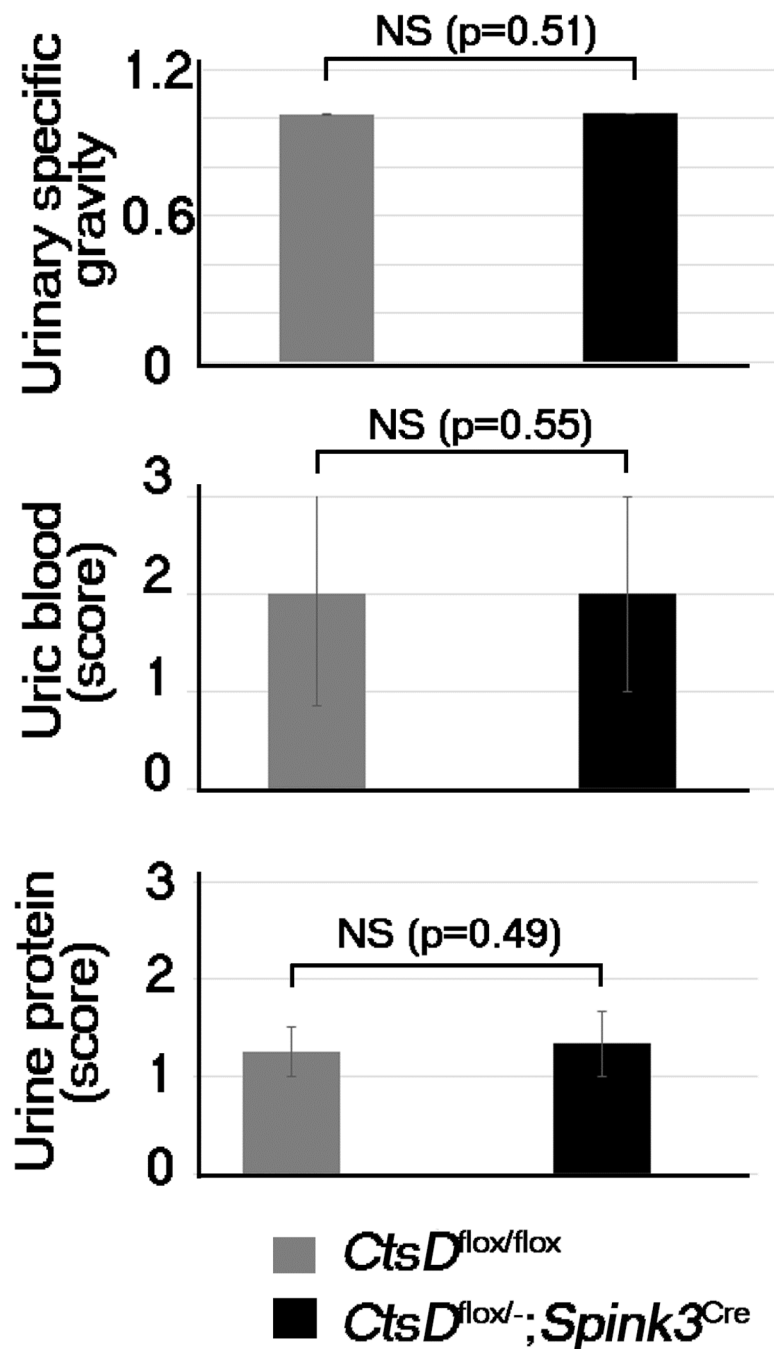

**Figure S2.** Negligible difference in urinalysis between *CtsD*<sup>lox/-</sup>; *Spink3*<sup>Cre</sup> and Control mice. Urine analyses were performed in *CtsD*<sup>lox/-</sup>; *Spink3*<sup>Cre</sup> and control mice 48 hours after ischemia/reperfusion (I/R) injury with hemi-nephrectomy. **Urinary specific gravity**, **Uric blood** and **Urine protein** are shown ( $n = 3$ ). Data in graphs are expressed as the mean  $\pm$  SEM. Statistical analyses were performed using a student's t-test, and statistical significance was set at  $p < 0.05$ .

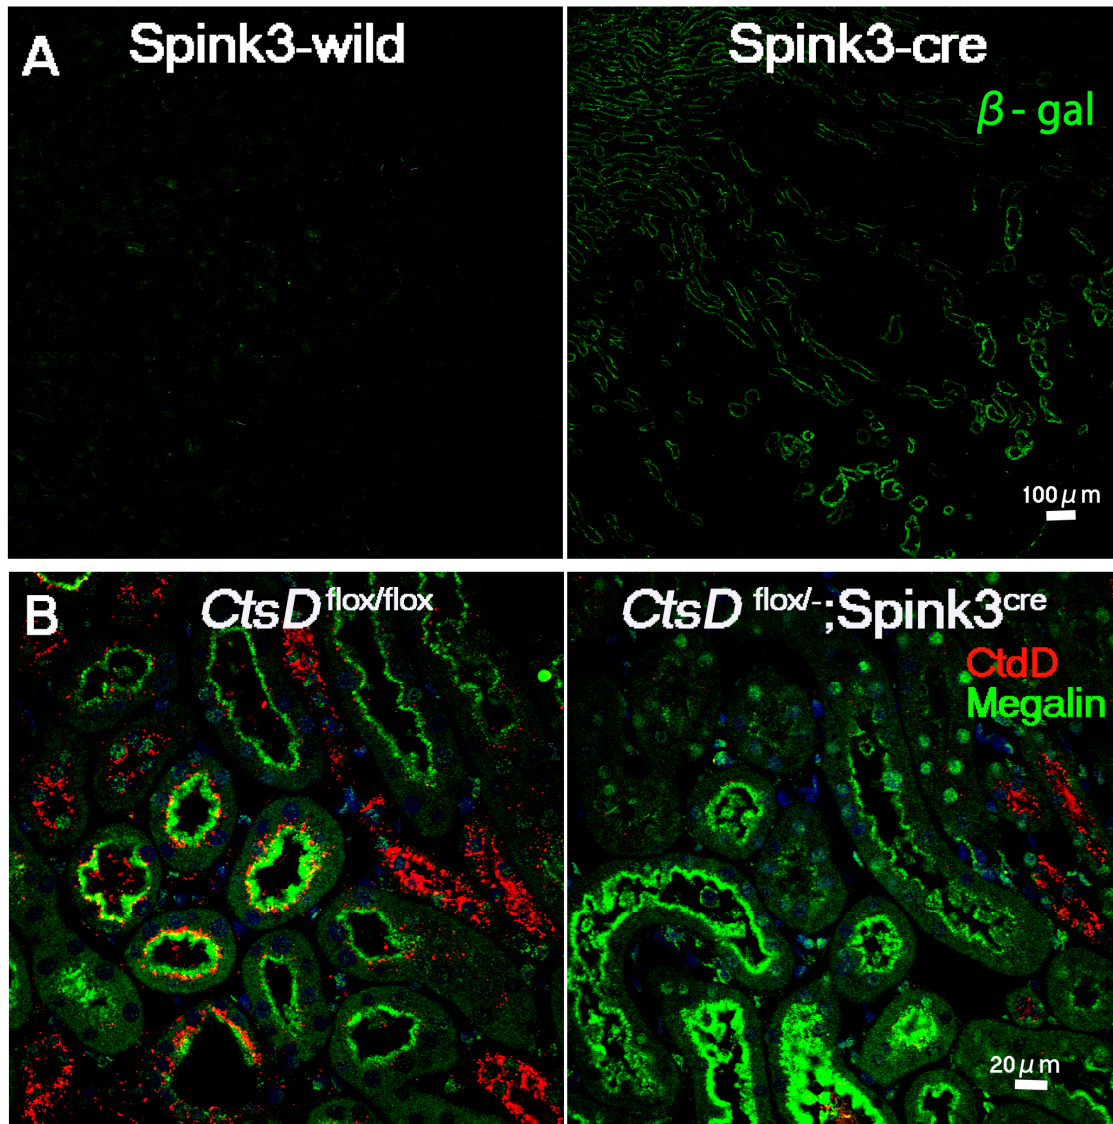

**Figure S3.** Megalin, a marker of renal proximal tubular cells, positive cells lacked cathepsin D-immunopositive signals in *CtsD<sup>flox/-</sup>; Spink3<sup>Cre</sup>* mice. **(A)** X-gal staining of *Spink3-cre* mouse kidneys for confirmation of *Spink3* expression in renal tubular cells (**Green**). Tubular cells in the cortico-medullary region were stained. **(B)** Double staining of cathepsin D (**Red**) and Megalin (a marker of proximal tubular cells, **Green**). No **red** signals of cathepsin D were detected in the Megalin positive (**Green**) proximal tubular cells of *CtsD<sup>flox/-</sup>; Spink3<sup>Cre</sup>* mice.

## Supplementary Methods

### *X-gal staining*

To determine *Spink3* promoter activity, we detected the activity of  $\beta$ galactosidase produced by the knock-in lacZ. *Spink3-Cre* mice were bred with Rosa26R-Z mice. ROSA26 is a locus used for constitutive, ubiquitous gene expression in mice [1].

At 6 weeks of age, these mice were anesthetized and fixed by intracardial perfusion. Kidneys were removed and embedded in O.C.T compound and frozen. X-gal staining was done as described previously [2]. In brief, 8  $\mu$ m frozen sections of *Spink3-wild*; R26R and *Spink3-cre*; R26R mice were

blocked with 0.1% BSA for 1 hour and incubated with rabbit anti- $\beta$  galactosidase antibody (cappel, CA, USA) in 1% BSA overnight. After washing anti-rabbit Alexa488 and DAPI were added and incubated at room temperature for 1 hour. Images were taken using a Fluorescence microscope FV1000 (OLYMPUS).

#### *Biochemical analysis*

Mice were anesthetized and blood was withdrawn by cardiac puncture. Blood samples were centrifuged for 15 min at 3,000 g at room temperature and sera were collected. The sera were biochemically analyzed via Oriental Yast Co,ltd. Urine samples were collected before collecting blood and tested using urine test paper (Uro-Hema-Combistix SG-L; Siemens Healthcare Diagnostics).

#### **References**

1. Soriano, P., Generalized lacZ expression with the ROSA26 Cre reporter strain. *Nat Genet* **1999**, 21, (1), 70–71.
2. Wang, J.; Ohmuraya, M.; Hirota, M.; Baba, H.; Zhao, G.; Takeya, M.; Araki, K.; Yamamura, K., Expression pattern of serine protease inhibitor kazal type 3 (Spink3) during mouse embryonic development. *Histochem. Cell Biol.* **2008**, 130, (2), 387–397.
